# Supplementary material
Source: HighWire-hosted journal article supplement (https://ijgc.bmj.com/content/34/3/363)
Supplement: inline-supplementary-material-1 [file inline-supplementary-material-1.pdf]

## SUPPORTING INFORMATION ON THE INTERNET

The following supporting information may be found in the online version of this article:

- Appendix S1** Standardized ultrasound report for vulvar cancer assessment
- Appendix S2** Standardized ultrasound report for vaginal cancer assessment
- Appendix S3** Standardized ultrasound report for cervical cancer assessment
- Appendix S4** Standardized ultrasound report for endometrial cancer assessment
- Appendix S5** Standardized ultrasound report for tubo-ovarian cancer assessment
- Videoclip S1** Ultrasound and other imaging methods for assessing vulvar cancer
- Videoclip S2** Ultrasound of a tumour in the upper part of the vagina
- Videoclip S3** Ultrasound scanning in cervical cancer
- Videoclip S4** Ultrasound of a tumour cervical cancer on the anterior lip
- Videoclip S5** Ultrasound scanning in endometrial cancer
- Videoclip S6** Assessing tumour spread in endometrial cancer
- Videoclip S7** How to apply the two-step strategy in assessing adnexal masses
- Videoclip S8** Imaging and laparoscopy in the assessment of tubo-ovarian cancer spread
